# Supplementary material for: LIPG signaling promotes tumor initiation and metastasis of human basal-like triple-negative breast cancer
Source: eLife. 2018 Jan 19;7:e31334. doi: 10.7554/eLife.31334 (PMC5809145; doi:10.7554/eLife.31334)
Supplement: Figure 1—source data 1. — The source data file contains numerical data that were used to generate the data graph presented in Figure 1A. [file elife-31334-fig1-data1.xlsx]

## Sheet: Sheet1
The source data for Figure 1A: LIPG expression in different subtypes of breast cancer
Breast	TNBC	HER2+BC	ER+BC
-2.718	-2.9195	-2.55875	-4.881
-2.604	-1.968	-2.462	-3.0515
-2.354	-1.322	-2.3125	-2.9795
-1.96975	-1.268	-2.0485	-2.9675
-1.736	-0.838	-2.017	-2.8115
-1.587	-0.7515	-1.9785	-2.5825
-1.538	-0.4355	-1.97075	-2.55875
-1.518	-0.405	-1.95525	-2.5125
-1.464	-0.374	-1.954	-2.4805
-1.424	-0.374	-1.928	-2.375
-1.3595	-0.327	-1.8445	-2.364
-1.3585	-0.2945	-1.7515	-2.3125
-1.271	-0.087	-1.742	-2.3045
-0.976	-0.01925	-1.677	-2.256
-0.74	0.11625	-1.578	-2.2435
-0.715	0.13725	-1.486	-2.243
-0.683	0.3175	-1.4855	-2.23875
-0.683	0.3875	-1.4485	-2.21475
-0.6655	0.4535	-1.434	-2.209
-0.604	0.5625	-1.392	-2.185
-0.5995	0.6235	-1.3355	-2.1495
-0.5335	0.6925	-1.289	-2.092
-0.5095	0.6965	-1.2695	-2.05
-0.4585	0.841	-1.2555	-2.0485
-0.447	0.8815	-1.252	-2.017
-0.2795	0.916	-1.201	-2.0065
-0.2475	0.966	-1.1895	-1.997
-0.2335	0.9885	-1.1775	-1.98225
-0.2275	1.015	-1.1725	-1.9815
-0.1955	1.045	-1.0875	-1.9785
-0.1825	1.0565	-1.08	-1.972
-0.1735	1.0845	-1.026	-1.97075
-0.165	1.142	-0.9855	-1.95525
-0.124	1.339	-0.9685	-1.954
0.0165	1.3465	-0.905	-1.928
0.0295	1.5185	-0.887	-1.912
0.1025	1.6345	-0.794	-1.882
0.1735	1.9545	-0.7805	-1.8445
0.184	1.987	-0.767	-1.836
0.2885	2.0405	-0.7545	-1.8265
0.3025	2.436	-0.701	-1.817
0.3035	2.811	-0.6185	-1.789
0.31867	2.9265	-0.615	-1.7615
0.3355	3.541	-0.588	-1.752
0.382	3.6105	-0.5595	-1.7515
0.397	5.512	-0.55	-1.744
0.4205		-0.4765	-1.742
0.4585		-0.47025	-1.692
0.524		-0.422	-1.684
0.5515		-0.3205	-1.677
0.5725		-0.3125	-1.66325
0.577		-0.2635	-1.609
0.642		-0.261	-1.6
0.6985		-0.067	-1.5935
0.9505		0.1625	-1.57975
0.97575		0.1685	-1.525
1.041		0.2	-1.52
1.134		0.223	-1.5165
1.2235		0.235	-1.505
1.3005		0.247	-1.505
1.7355		0.2785	-1.486
		0.392	-1.4855
		0.5115	-1.481
		0.6525	-1.4515
		0.803	-1.451
		1.061	-1.4485
		3.0095	-1.442
			-1.434
			-1.43
			-1.406
			-1.392
			-1.3875
			-1.384
			-1.376
			-1.3655
			-1.3355
			-1.333
			-1.32
			-1.3195
			-1.3125
			-1.2795
			-1.2765
			-1.274
			-1.2735
			-1.2695
			-1.2665
			-1.2555
			-1.253
			-1.241
			-1.239
			-1.2345
			-1.215
			-1.2125
			-1.2045
			-1.2025
			-1.201
			-1.19
			-1.1895
			-1.181
			-1.181
			-1.1775
			-1.1725
			-1.146
			-1.136
			-1.1295
			-1.1265
			-1.1195
			-1.1075
			-1.102
			-1.0935
			-1.08
			-1.074
			-1.064
			-1.0595
			-1.0545
			-1.049
			-1.047
			-1.036
			-1.026
			-1.02
			-1.018
			-1.0045
			-0.969
			-0.9625
			-0.9595
			-0.953
			-0.918
			-0.91675
			-0.905
			-0.887
			-0.8735
			-0.8565
			-0.8285
			-0.794
			-0.7805
			-0.7805
			-0.7685
			-0.765
			-0.763
			-0.7615
			-0.747
			-0.7445
			-0.743
			-0.7285
			-0.7165
			-0.7075
			-0.70325
			-0.701
			-0.691
			-0.6875
			-0.686
			-0.665
			-0.6475
			-0.6475
			-0.6465
			-0.628
			-0.607
			-0.604
			-0.6025
			-0.573
			-0.561
			-0.5595
			-0.553
			-0.537
			-0.5245
			-0.5045
			-0.4895
			-0.4765
			-0.4345
			-0.4285
			-0.4265
			-0.422
			-0.3985
			-0.3925
			-0.386
			-0.375
			-0.3735
			-0.36025
			-0.3205
			-0.319
			-0.3125
			-0.311
			-0.30875
			-0.261
			-0.2545
			-0.252
			-0.2375
			-0.2215
			-0.2195
			-0.2065
			-0.1915
			-0.1855
			-0.1465
			-0.086
			-0.0835
			-0.067
			0.0045
			0.0115
			0.0215
			0.059
			0.081
			0.0895
			0.1175
			0.152
			0.2
			0.223
			0.223
			0.248
			0.2785
			0.2855
			0.392
			0.6175
			0.6525
			0.7115
			0.7125
			0.736
			0.803
			0.8435
			0.904
			0.9685
			1.2065
			1.566
			1.754
			3.0095
			3.367
