# Supplementary material for: LIPG signaling promotes tumor initiation and metastasis of human basal-like triple-negative breast cancer
Source: eLife. 2018 Jan 19;7:e31334. doi: 10.7554/eLife.31334 (PMC5809145; doi:10.7554/eLife.31334)
Supplement: Figure 1—source data 2. — The source data file contains numerical data that were used to generate the data graph presented in Figure 1B. [file elife-31334-fig1-data2.xlsx]

## Sheet: Sheet1
The source data for Figure 1B: LIPG expression in different molecular subtypes of breast cancer
Basal-like	Luminal A	Luminal B
-1.759	-1.957	-1.752
-1.545	-1.738	-1.642
-1.44	-1.555	-1.546
-1.314	-1.472	-1.511
-1.194	-1.257	-1.476
-1.181	-1.229	-1.39
-1.012	-1.167	-1.3735
-1.01	-1.122	-1.362
-0.985	-1.104	-1.356
-0.927	-1.014	-1.336
-0.859	-0.999	-1.3185
-0.803	-0.975	-1.194
-0.711	-0.956	-1.187
-0.706	-0.956	-1.133
-0.616	-0.9095	-1.098
-0.585	-0.884	-0.966
-0.569	-0.8565	-0.849
-0.558	-0.821	-0.796
-0.543	-0.7765	-0.757
-0.51	-0.747	-0.752
-0.469	-0.742	-0.701
-0.45	-0.707	-0.678
-0.44	-0.706	-0.517
-0.437	-0.599	-0.324
-0.337	-0.595	0.316
-0.288	-0.511
-0.189	-0.494
-0.137	-0.463
-0.115	-0.461
-0.073	-0.41
-0.028	-0.409
0.025	-0.403
0.135	-0.374
0.252	-0.286
0.376	-0.244
0.391	-0.21
0.457	-0.182
0.581	-0.1
0.698	-0.088
0.744	-0.075
0.892	0.026
0.987	0.107
1.391	0.406
1.489	0.515
1.891	0.577
	0.715
