# Supplementary material for: LIPG signaling promotes tumor initiation and metastasis of human basal-like triple-negative breast cancer
Source: eLife. 2018 Jan 19;7:e31334. doi: 10.7554/eLife.31334 (PMC5809145; doi:10.7554/eLife.31334)
Supplement: Figure 1—source data 3. — The source data file contains numerical data that were used to generate data graphs presented in sub-figures (1C, D) of Figure 1. [file elife-31334-fig1-data3.xlsx]

## Sheet: Sheet1
The source data for Figure 1C: LIPG mRNA expression in normal breast, TNBC and ER+PR+HER2- luminal breast cancers
fold	fold	fold	log2	log2	log2
Breast	TNBC	LuBC	Breast	TNBC	LuBC
1	0.712279	0.306972	0	-0.489486	-1.70382
0.150702	0.254816	0.170749	-2.73023	-1.97247	-2.55005
0.399372	2.8081	0.0697505	-1.32419	1.48959	-3.84165
0.641445	2.68577	0.0206125	-0.640603	1.42533	-5.60033
0.518385	3.59416	0.27263	-0.947906	1.84565	-1.87498
0.256119	1.7228	0.86833	-1.96511	0.784756	-0.203685
	5.5362	0.553786		2.4689	-0.8526
	0.449917	0.0306857		-1.15227	-5.02629
The source data for Figure 1D: LIPG protein expression in TNBC and LuBC according to H-scoring of IHC-stained tissues using the anti-LIPG antibody
LuBC	TNBC
25	275
145	220
125	255
85	80
35	240
70	110
180	160
100	180
10	245
15	235
20	215
25	195
30	165
35	125
40	140
45	95
10	115
5	135
15
20
25
50
70
65
75
85
90
95
100
105
130
30
80
55
40
60
0
15
10
35
85
30
75
40
70
110
10
15
5
0
20
30
45
60
90
