# Supplementary material for: LIPG signaling promotes tumor initiation and metastasis of human basal-like triple-negative breast cancer
Source: eLife. 2018 Jan 19;7:e31334. doi: 10.7554/eLife.31334 (PMC5809145; doi:10.7554/eLife.31334)
Supplement: Figure 1—source data 4. [file elife-31334-fig1-data4.xlsx]

## Sheet: Sheet1
The source data for Figure 1E: LIPG expression in different molecular subtypes of breast cancer cell lines
Basal-like	Her2-amplified	Luminal
-4.22971	-2.76727	-1.5333
-1.39533	-2.13258	-1.5017
-0.8578	-1.60781	-0.81536
-0.61815	-1.21261	-0.78968
-0.16668	-0.68374	-0.78337
0.0132	-0.6473	-0.63187
0.09213	-0.18302	-0.58177
0.39831	-0.15605	-0.4889
0.66621	-0.04315	-0.464
0.72516	0.11316	-0.18088
0.84734	0.22739	-0.05819
1.94444	0.68214	0.07029
2.62906	1.08894	0.39729
2.94345	1.32764
3.08517	1.77112
3.59285
3.76707
4.15633
4.53411
4.99783
