# Supplementary material for: LIPG signaling promotes tumor initiation and metastasis of human basal-like triple-negative breast cancer
Source: eLife. 2018 Jan 19;7:e31334. doi: 10.7554/eLife.31334 (PMC5809145; doi:10.7554/eLife.31334)
Supplement: Figure 2—source data 1. — The source data file contains numerical data that were used to generate data graphs presented in sub-figures (2A, B, C, D, E, F) of Figure 2. [file elife-31334-fig2-data1.xlsx]

## Sheet: Sheet1
The source data for Figure 2A: Growth of parental control and LIPG-overexpressing MCF7 cells with or without LIPG knockdown
1X105	MCF7-CTRL+siControl			MCF7-CTRL+siLIPG			MCF7-LIPG+siControl			MCF7-LIPG+siLIPG
Cell no.	Mean	SD	n	Mean	SD	n	Mean	SD	n	Mean	SD	n
Day 0	2	0	3	2	0	3	2	0	3	2	0	3
Day 1	2.6	0.23	3	2.73	0.31	3	2.54	0.17	3	2.33	0.21	3
Day 2	5.16	0.42	3	5.76	0.53	3	4.95	0.43	3	3.38	0.39	3
Day 3	10.47	0.85	3	11.37	0.94	3	9.85	0.75	3	4.73	0.48	3
The source data for Figure 2B: LIPG overexpression promotes migration of MCF7 cells
	MCF7+siControl	MCF7+siLIPG	MCF7-LIPG+siControl	MCF7-LIPG+siLIPG
N1	84	79	357	144
N2	62	52	254	88
N3	74	66	308	114
The source data for Figure 2C: LIPG overexpression enhances the primary and secondary CSC sphere formation of MCF7
	Primary spheres (S1)			Secondary spheres (S2)
	N1	N2	N3	N1	N2	N3
MCF7+siControl	66	69	78	63	52	74
MCF7+siLIPG	57	63	82	62	65	54
MCF7-LIPG+siControl	187	204	238	273	295	256
MCF7-LIPG+siLIPG	92	85	79	117	97	85
The source data for Figure 2D: LIPG overexpression increases the CSC-enriched CD24-/CD44+ cell subset in MCF7 cells
% of the CD24-CD44+ cell subset
	MCF7+siControl	MCF7+siLIPG	MCF7-LIPG+siControl	MCF7-LIPG+siLIPG
N1	5.24	5.44	11.17	6.77
N2	4.34	4.94	11.46	6.24
N3	4.58	4.68	10.38	5.87
The source data for Figure 2E: LIPG overexpression decreases the EpCAMhigh cell population in MCF7 cells.
% of the EpCAMhigh cell subset
	MCF7+siControl	MCF7+siLIPG	MCF7-LIPG+siControl	MCF7-LIPG+siLIPG
N1	62.53	63.73	41.86	56.84
N2	64.47	66.74	46.16	59.46
N3	58.38	58.25	37.75	54.18
The source data for Figure 2F: LIPG overexpression in MCF7 cells leads to the increased expression of basal/EMT and stem cell genes and downregulation of E-cadherin
	MCF7-CTRL+siControl			MCF7-CTRL+siLIPG			MCF7-LIPG+siControl			MCF7-LIPG+siLIPG
fold	Mean	SD	n	Mean	SD	n	Mean	SD	n	Mean	SD	n
KRT14	1.032	0.107	3	0.934	0.087	3	2.382	0.237	3	1.439	0.065	3
E-cadherin	1.114	0.079	3	1.105	0.129	3	0.519	0.087	3	0.874	0.067	3
ZEB1	0.987	0.116	3	1.074	0.106	3	3.518	0.278	3	1.373	0.121	3
IL6	0.996	0.139	3	0.876	0.117	3	2.824	0.347	3	1.626	0.158	3
CD133	1.025	0.037	3	0.973	0.067	3	1.895	0.176	3	1.132	0.064	3
PROCR	1.063	0.138	3	1.257	0.125	3	2.769	0.185	3	1.142	0.153	3
SOX9	0.973	0.057	3	0.948	0.093	3	1.756	0.197	3	1.156	0.084	3
