# Supplementary material for: LIPG signaling promotes tumor initiation and metastasis of human basal-like triple-negative breast cancer
Source: eLife. 2018 Jan 19;7:e31334. doi: 10.7554/eLife.31334 (PMC5809145; doi:10.7554/eLife.31334)
Supplement: Figure 3—source data 1. — The source data file contains numerical data that were used to generate data graphs presented in sub-figures (3B, C, D, E, F, G) of Figure 3. [file elife-31334-fig3-data1.xlsx]

## Sheet: Sheet1
The source data for Figure 3B: Loss of the lipase catalytic activity of LIPG attenuates cell growth.
2X105	MCF7-CTRL			MCF7-LIPG			MCF7-LIPGS149A
Cell no.	Mean	SD	n	Mean	SD	n	Mean	SD	n
Day 0	2	0	3	2	0	3	2	0	3
Day 1	3.8	0.23	3	3.56	0.17	3	3.24	0.21	3
Day 2	7.22	0.37	3	6.54	0.53	3	5.25	0.28	3
Day 3	13.72	0.73	3	12.28	1.14	3	8.51	0.57	3
Day 4	26.06	1.47	3	21.08	1.76	3	13.78	0.92	3
The source data for Figure 3C: LIPGS149A is potent to promote migration of MCF7 cells
	MCF7-CTRL	MCF7-LIPG	MCF7-LIPGS149A
N1	43	245	344
N2	58	218	388
N3	49	277	314
The source data for Figure 3D: LIPGS149A is competent to enhance the primary and secondary CSC sphere formation of MCF7 but fails to promote sphere cell proliferation
	Primary spheres (S1)			Secondary spheres (S2)
	N1	N2	N3	N1	N2	N3
MCF7-CTRL	74	87	95	74	66	87
MCF7-LIPG	225	239	261	314	341	292
MCF7-LIPGS149A	171	195	226	215	249	326
The source data for Figure 3E: LIPGS149A overexpression increases the CSC-enriched CD24-/CD44+ cell subset in MCF7 cells
% of the CD24-/CD44+ cell subset
	MCF7-CTRL	MCF7-LIPG	MCF7-LIPGS149A
N1	5.44	11.78	15.76
N2	4.34	9.46	15.14
N3	4.53	11.06	14.27
The source data for Figure 3F: LIPGS149A overexpression decreases the EpCAMhigh cell population in MCF7 cells
% of the EpCAMhigh cell subset
	MCF7-CTRL	MCF7-LIPG	MCF7-LIPGS149A
N1	62.83	37.84	23.47
N2	66.47	42.16	19.73
N3	57.38	32.75	28.34
The source data for Figure 3G: LIPGS149A overexpression in MCF7 cells leads to the increased expression of basal/EMT and stem cell genes and downregulation of E-cadherin
	MCF7-CTRL			MCF7-LIPG			MCF7-LIPGS149A
fold	Mean	SD	n	Mean	SD	n	Mean	SD	n
KRT14	0.98777	0.047593	3	1.84481	0.0818087	3	2.88972	0.122991	3
E-cadherin	1.09598	0.0991681	3	0.419556	0.0588868	3	0.423554	0.0481696	3
ZEB1	1.00363	0.0566022	3	3.79025	0.0563565	3	4.10305	0.613027	3
IL6	1.01016	0.0581538	3	3.2551	0.292917	3	4.89547	0.473373	3
CD133	0.98445	0.0588013	3	2.02623	0.149794	3	4.3318	0.234205	3
PROCR	0.951643	0.0464082	3	3.14363	0.206901	3	4.80335	0.464002	3
SOX9	0.99665	0.00445554	3	2.13554	0.207836	3	0.979347	0.0150896	3
