# Supplementary material for: LIPG signaling promotes tumor initiation and metastasis of human basal-like triple-negative breast cancer
Source: eLife. 2018 Jan 19;7:e31334. doi: 10.7554/eLife.31334 (PMC5809145; doi:10.7554/eLife.31334)
Supplement: Figure 4—source data 1. [file elife-31334-fig4-data1.xlsx]

## Sheet: Sheet1
The source data for Figure 4A: LIPG knockdown inhibits cell growth of MCF10DCIS cells
1X104	siControl			siLIPG-1			siLIPG-2
Cell no.	Mean	SD	n	Mean	SD	n	Mean	SD	n
Day 0	1	0	3	1	0	3	1	0	3
Day 1	1.79	0.17	3	1.48	0.19	3	1.58	0.15	3
Day 2	4.13	0.46	3	2.04	0.23	3	2.46	0.26	3
Day 3	10.34	1.37	3	2.77	0.29	3	3.87	0.39	3
The source data for Figure 4B: LIPG knockdown impairs migration of MCF10DCIS cells
	siControl	siLIPG-1	siLIPG-2
N1	648	52	192
N2	753	67	153
N3	537	84	126
The source data for Figure 4C: LIPG knockdown suppresses invasion of MCF10DCIS cells
	siControl	siLIPG-1	siLIPG-2
N1	142	2	6
N2	124	3	9
N3	105	1	7
The source data for Figure 4D: LIPG knockdown leads to decreases in primary and secondary sphere formation of MCF10DCIS cells
	Primary spheres (S1)			Secondary spheres (S2)
	N1	N2	N3	N1	N2	N3
siControl	227	282	327	168	211	243
siLIPG-1	57	45	38	41	31	23
siLIPG-2	79	63	54	54	45	37
The source data for Figure 4E: LIPG knockdown increases the EpCAM-positive cell population in MCF10DCIS cells
% of EpCAM+ cells
	siControl	siLIPG-1	siLIPG-2
N1	28.13	52.84	48.62
N2	24.52	48.76	46.64
N3	30.14	45.37	42.47
The source data for Figure 4F: LIPG knockdown results in the downregulation of stem cell gene expression in MCF10DCIS cells
	siControl			siLIPG-1			siLIPG-2
fold	Mean	SD	n	Mean	SD	n	Mean	SD	n
IL6	1.08	0.063	3	0.282	0.037	3	0.342	0.025	3
SOX2	1.03	0.095	3	0.419	0.057	3	0.479	0.044	3
OCT4	1.11	0.152	3	0.581	0.063	3	0.631	0.103	3
ABCG2	0.97	0.059	3	0.424	0.047	3	0.484	0.067	3
PROCR	0.95	0.077	3	0.495	0.076	3	0.555	0.096	3
SOX9	1.06	0.148	3	0.634	0.045	3	0.664	0.075	3
The source data for Figure 4G: LIPG knockdown leads to the downregulation of basal/EMT gene expression
	siControl			siLIPG-1			siLIPG-2
fold	Mean	SD	n	Mean	SD	n	Mean	SD	n
KRT14	1.04	0.083	3	0.484	0.037	3	0.594	0.057	3
Vimentin	1.06	0.115	3	0.457	0.043	3	0.527	0.073	3
FOXC2	0.97	0.072	3	0.126	0.013	3	0.182	0.013	3
TWIST	0.99	0.149	3	0.413	0.055	3	0.493	0.067	3
ZEB1	1.03	0.095	3	0.446	0.025	3	0.533	0.074	3
SLUG	0.98	0.173	3	0.426	0.034	3	0.536	0.056	3
N-cadherin	0.96	0.048	3	0.272	0.025	3	0.342	0.045	3
Fibronectin	1.02	0.114	3	0.573	0.074	3	0.693	0.091	3
