# Supplementary material for: LIPG signaling promotes tumor initiation and metastasis of human basal-like triple-negative breast cancer
Source: eLife. 2018 Jan 19;7:e31334. doi: 10.7554/eLife.31334 (PMC5809145; doi:10.7554/eLife.31334)
Supplement: Figure 5—source data 1. — The source data file contains numerical data that were used to generate data graphs presented in sub-figures (5A, B, C, D, E, F, G, I) of Figure 5. [file elife-31334-fig5-data1.xlsx]

## Sheet: Sheet1
The source data for Figure 5A: LIPG inactivation attenuates in vitro cell growth of MDA-MB-468
1X104	Scramble shRNA			LIPG shRNA-1			LIPG shRNA-2
Cell no.	Mean	SD	n	Mean	SD	n	Mean	SD	n
Day 0	1	0	3	1	0	3	1	0	3
Day 1	2.23	0.29	3	1.68	0.23	3	1.81	0.25	3
Day 2	5.52	0.73	3	2.86	0.51	3	3.28	0.42	3
Day 3	13.25	2.27	3	4.86	0.83	3	6.78	1.24	3
The source data for Figure 5B: LIPG depletion impairs migration of MDA-MB-468 cells
	Scramble	shLIPG-1	shLIPG-2
N1	1347	42	144
N2	963	75	84
N3	1138	59	113
The source data for Figure 5C: LIPG deficiency inhibits invasion of MDA-MB-468 cells
	Scramble	shLIPG-1	shLIPG-2
N1	642	12	26
N2	424	23	39
N3	525	5	57
The source data for Figure 5D: LIPG knockdown suppresses primary and secondary CSC sphere formation of MDA-MB-468
	Primary spheres (S1)			Secondary spheres (S2)
	N1	N2	N3	N1	N2	N3
Scramble	72	91	67	87	108	96
shLIPG-1	21	12	16	26	15	21
shLIPG-2	30	20	26	37	31	25
The source data for Figure 5E: Loss of LIPG abrogates in vivo tumor formation of MDA-MB-468
	Scramble shRNA			LIPG shRNA-1
Day	Mean	SD	n	Mean	SD	n
4	45.7188	7.71076	6	36.8646	14.0258	6
8	93.8224	16.4814	6	36.8292	15.1861	6
12	229.896	28.9118	6	28.8516	6.26983	6
16	507.423	131.946	6	23.5664	3.88932	6
20	845.962	199.124	6	23.0512	6.85306	6
24	1346.53	319.361	6	16.7176	7.80035	6
The source data for Figure 5F: LIPG knockdown downregulates the expression of stem cell genes in MDA-MB-468 cells
	Scramble			shLIPG-1			shLIPG-2
fold	Mean	SD	n	Mean	SD	n	Mean	SD	n
IL6	0.99	0.183	3	0.244	0.027	3	0.494	0.097	3
SOX1	0.98	0.075	3	0.157	0.033	3	0.477	0.083	3
OCT4	1.04	0.122	3	0.556	0.053	3	0.882	0.043	3
ABCG2	0.97	0.049	3	0.323	0.085	3	0.413	0.037	3
PROCR	1.05	0.165	3	0.626	0.055	3	0.933	0.144	3
ALDH1	1.02	0.073	3	0.466	0.039	3	0.316	0.056	3
CD133	1.03	0.148	3	0.642	0.075	3	0.942	0.045	3
SOX9	0.97	0.034	3	0.273	0.087	3	0.493	0.059	3
The source data for Figure 5G: LIPG knockdown downregulates the expression of EMT programming genes in MDA-MB-468 cells
	Scramble			shLIPG-1			shLIPG-2
fold	Mean	SD	n	Mean	SD	n	Mean	SD	n
FOXC2	1.05	0.073	3	0.444	0.047	3	0.894	0.157	3
SNAIL	0.98	0.145	3	0.377	0.039	3	0.327	0.073	3
SLUG	1.04	0.032	3	0.256	0.023	3	0.662	0.103	3
TWIST1	0.96	0.069	3	0.123	0.025	3	0.443	0.077	3
ZEB2	0.97	0.045	3	0.526	0.115	3	0.233	0.044	3
Fibronectin	1.03	0.153	3	0.186	0.019	3	0.376	0.046	3
The souce data for Figure 5I: LIPG inactivation abrogates in vivo lung metastasis of MDA-MB-468 cells
The number of metastatic tumor foci
	Scramble	shLIPG-1
N1	4	0
N2	7	0
N3	3	0
N4	2	0
N5	5	0
