# Supplementary material for: LIPG signaling promotes tumor initiation and metastasis of human basal-like triple-negative breast cancer
Source: eLife. 2018 Jan 19;7:e31334. doi: 10.7554/eLife.31334 (PMC5809145; doi:10.7554/eLife.31334)
Supplement: Figure 6—source data 1. — The source data file contains numerical data that were used to generate data graphs presented in sub-figures (6A, D) of Figure 6. [file elife-31334-fig6-data1.xlsx]

## Sheet: Sheet1
The source data for Figure 6A: ISG15 mRNA expression is LIPG-dependent
	MCF7	MCF7	MCF7	MCF10DCIS	MCF10DCIS	MCF10DCIS	MCF10DCIS	MDA-MB-468	MDA-MB-468	MDA-MB-468	MDA-MB-468
LIPG OE	No	Yes	Yes	No	No	Yes	Yes	No	No	Yes	Yes
LIPG KD	No	No	Yes	No	Yes	No	Yes	No	Yes	No	Yes
N1	1	3.67	0.23	1	0.28	3.18	0.65	1	0.11	4.46	0.5
N2	0.85	3.13	0.16	0.95	0.16	3.97	0.47	0.88	0.08	5.88	0.32
N3	1.27	2.69	0.12	1.12	0.07	4.52	0.31	1.19	0.03	6.78	0.21
The source data for Figure 6D: ISG15 mRNA expression is positively correlated with LIPG expression in human basal-like breast cancers
	LIPG	ISG15
H021108	-1.012	1.95
H516397	-0.578	1.895
H629717	0.498	1.091
H629719	-0.573	2.105
H957385	-0.288	0.176
H957549	-0.137	0.351
I130598	0.481	0.59
I258318	-0.56	1.635
I258325	0.744	1.16
I383208	1.341	2.551
I612036	0.252	0.903
I633488	-1.314	0.914
J018787	-1.181	1.289
J168308	-0.616	1.231
J168936	-0.249	1.332
J168937	-1.194	-0.098
J460617	0.892	0.892
J470138	-0.078	0.527
J472757	-0.985	1.632
J472758	-0.859	0.278
J762326	-0.579	1.513
K121818	-1.759	0.879
K205585	1.389	1.321
K282376	-0.44	0.495
K282378	-1.01	0.418
K320417	0.035	1.703
K826609	-0.135	0.78
K826616	-0.927	1.117
L432758	0.391	1.49
L444939	-0.615	1.308
L768268	-1.545	3.123
L775237	-0.559	2.944
M200498	0.927	0.887
M228987	0.457	2.485
M256097	-0.706	1.852
M256098	-0.337	0.128
M308596	0.803	5.184
N123517	-0.437	1.934
N820416	-0.113	2.766
N820418	-0.53	0.699
N843157	-0.025	0.125
N852648	0.376	2.014
O219015	1.891	4.765
O219016	-1.44	0.429
P553317	-0.711	0.791
