# Supplementary material for: LIPG signaling promotes tumor initiation and metastasis of human basal-like triple-negative breast cancer
Source: eLife. 2018 Jan 19;7:e31334. doi: 10.7554/eLife.31334 (PMC5809145; doi:10.7554/eLife.31334)
Supplement: Figure 6—source data 2. — The source data file contains numerical data that were used to generate data graphs presented in sub-figures (6E, F, G, H, I, J, L, M) of Figure 6. [file elife-31334-fig6-data2.xlsx]

## Sheet: Sheet1
The source data for Figure 6E: ISG15 knockdown impairs cell growth of MCF10DCIS and MDA-MB-468
1X104	MCF10DCIS+siControl			MCF10DCIS+si-ISG15			MDA-MB-468+siControl			MDA-MB-468+si-ISG15
Cell no.	Mean	SD	n	Mean	SD	n	Mean	SD	n	Mean	SD	n
Day 0	1	0	3	1	0	3	1	0	3	1	0	3
Day 1	1.97	0.27	3	1.67	0.32	3	2.26	0.35	3	1.83	0.29	3
Day 2	4.73	0.66	3	2.46	0.46	3	5.58	0.92	3	3.96	0.52	3
Day 3	11.64	1.37	3	5.97	1.09	3	13.24	1.77	3	9.27	1.03	3
The source data for Figure 6F: ISG15 knockdown inhibits migration of MCF10DCIS and MDA-MB-468 cells
	MCF10DCIS		MDA-MB-468
	siControl	si-ISG15	siControl	si-ISG15
N1	778	102	824	53
N2	723	82	1138	87
N3	637	114	966	74
The source data for Figure 6G: ISG15 knockdown suppresses invasion of MCF10DCIS and MDA-MB-468
	MCF10DCIS		MDA-MB-468
	siControl	si-ISG15	siControl	si-ISG15
N1	126	15	437	38
N2	158	9	493	24
N3	104	24	407	18
The source data for Figure 6H: ISG15 knockdown attenuates primary and secondary CSC sphere formation of MCF10DCIS and MDA-MB-468
		Primary spheres (S1)			Secondary spheres (S2)
		N1	N2	N3	N1	N2	N3
MCF10DCIS	siControl	22	28	34	16	20	25
MCF10DCIS	si-ISG15	18	16	12	14	11	8
MDA-MB-468	siControl	92	85	77	138	126	109
MDA-MB-468	si-ISG15	60	52	45	94	73	63
The source data for Figure 6I: ISG15 knockdown increases EpCAM+ cells in MCF10DCIS
% of EpCAM+ cells
	siControl	si-ISG15
N1	25.13	60.78
N2	32.52	66.37
N3	38.14	54.82
The source data for Figure 6J: ISG15 knockdown downregulates the expression of stem cell and EMT genes in MCF10DCIS cells
	siControl			si-ISG15
fold	Mean	SD	n	Mean	SD	n
ABCG2	0.99	0.113	3	0.354	0.029	3
PROCR	1.02	0.059	3	0.54	0.038	3
FOXC2	1.04	0.072	3	0.381	0.053	3
ZEB1	1.05	0.109	3	0.324	0.018	3
ZEB2	0.97	0.037	3	0.375	0.058	3
SLUG	0.98	0.068	3	0.474	0.069	3
Vimentin	1.06	0.124	3	0.338	0.047	3
Fibronectin	1.01	0.085	3	0.108	0.013	3
N-cadherin	0.96	0.066	3	0.465	0.083	3
The source data for Figure 6L: ISG15 is required for LIPG overexpression-promoted invasion of MDA-MB-468
	Vector+siCTRL	LIPG OE+siCTRL	LIPG OE+siLIPG	LIPG OE+si-ISG15
N1	426	853	127	92
N2	478	927	93	77
N3	394	805	174	118
The source data for Figure 6M: ISG15 is required for LIPG-overexpression-enhanced expression of EMT genes in MDA-MB-468 cells
	Vector+siControl			LIPG OE+siControl			LIPG OE+siLIPG			LIPG OE+si-ISG15
fold	Mean	SD	n	Mean	SD	n	Mean	SD	n	Mean	SD	n
ZEB2	1.034	0.125	3	2.446	0.257	3	0.633	0.084	3	0.473	0.044	3
SLUG	0.974	0.083	3	3.626	0.534	3	0.736	0.066	3	0.606	0.096	3
Fibronectin	0.988	0.164	3	6.373	0.974	3	0.493	0.081	3	0.293	0.046	3
