# Supplementary material for: LIPG signaling promotes tumor initiation and metastasis of human basal-like triple-negative breast cancer
Source: eLife. 2018 Jan 19;7:e31334. doi: 10.7554/eLife.31334 (PMC5809145; doi:10.7554/eLife.31334)
Supplement: Figure 7—source data 1. — The source data file contains numerical data that were used to generate data graphs presented in sub-figures (7B, C, D) of Figure 7. [file elife-31334-fig7-data1.xlsx]

## Sheet: Sheet1
The source data for Figure 7B: DTX3L knockdown results in a modest decrease in LIPG mRNA levels in MCF10DCIS and MDA-MB-468 cells
	MCF10DCIS			MDA-MB-468
fold	Mean	SD	n	Mean	SD	n
siControl	1.028	0.079	3	0.99	0.133	3
siDTX3L-1	0.73	0.053	3	0.58	0.076	3
siDTX3L-2	0.78	0.083	3	0.64	0.114	3
The source data for Figure 7C: DTX3L deficiency shortens the half-life of LIPG protein in MDA-MB-468 cells
(hr)	Control	DTX3L KD
0	100	100
0.5	105	69
1	91	43
2	72	33
4	47
6	27
The source data for Figure 7D: DTX3L depletion facilitates proteasome-mediated LIPG protein degradation
	MCF10DCIS			MDA-MB-468
fold	Mean	SD	n	Mean	SD	n
Control	1	0	3	1	0	3
DTX3L KD	0.08	0.003	3	0.05	0.002	3
DTX3L KD+ MG132	0.73	0.061	3	0.59	0.047	3
