# Supplementary material for: LIPG signaling promotes tumor initiation and metastasis of human basal-like triple-negative breast cancer
Source: eLife. 2018 Jan 19;7:e31334. doi: 10.7554/eLife.31334 (PMC5809145; doi:10.7554/eLife.31334)
Supplement: Figure 7—source data 2. — The source data file contains numerical data that were used to generate the data graph presented in Figure 7F. [file elife-31334-fig7-data2.xlsx]

## Sheet: Sheet1
The source data for Figure 7F: DTX3L expression in breast cancer
TCGA	TCGA	Curtis	Curtis
Breast	IDC	Breast	IDC
-1.22	-2.819	-0.40943	-0.29672
-1.183	-1.401	-0.38819	-0.2038
-1.0315	-1.1025	-0.33086	-0.19818
-0.9315	-1.0555	-0.30993	-0.19749
-0.9295	-0.853	-0.29937	-0.1753
-0.906	-0.687	-0.27979	-0.17486
-0.792	-0.5975	-0.27449	-0.1409
-0.78625	-0.51975	-0.23097	-0.13941
-0.678	-0.513	-0.21974	-0.13903
-0.628	-0.4465	-0.20986	-0.13813
-0.6075	-0.3965	-0.20973	-0.13281
-0.55	-0.361	-0.19719	-0.11249
-0.4895	-0.31	-0.17585	-0.10026
-0.4675	-0.28675	-0.17485	-0.09797
-0.4225	-0.2645	-0.17265	-0.08815
-0.4085	-0.221	-0.17225	-0.08689
-0.3275	-0.1865	-0.16955	-0.08088
-0.306	-0.148	-0.16733	-0.0653
-0.303	-0.129	-0.1607	-0.06122
-0.2825	-0.098	-0.16028	-0.05599
-0.2675	-0.0835	-0.15407	-0.05502
-0.2485	-0.0675	-0.15149	-0.05312
-0.21	-0.0545	-0.14854	-0.04936
-0.134	-0.0255	-0.13789	-0.04864
-0.1235	-0.004	-0.12966	-0.04626
-0.1065	0.0015	-0.12719	-0.03274
-0.098	0.01075	-0.12605	-0.02509
-0.0955	0.0205	-0.12	-0.01997
-0.0385	0.03775	-0.11764	-0.00734
-0.0055	0.039	-0.11727	-0.00047
0.0285	0.064	-0.11685	0.00437
0.046	0.0655	-0.10602	0.00894
0.0905	0.0665	-0.10376	0.01159
0.1635	0.069	-0.0997	0.01531
0.1675	0.075	-0.09613	0.01595
0.2765	0.099	-0.09369	0.01979
0.283	0.115	-0.08921	0.02084
0.28375	0.1495	-0.0888	0.02091
0.2865	0.151	-0.08789	0.02455
0.301	0.155	-0.08602	0.02634
0.352	0.1745	-0.08487	0.02689
0.356	0.1865	-0.07539	0.02776
0.3755	0.19125	-0.07185	0.03007
0.381	0.195	-0.07133	0.03618
0.386	0.2125	-0.07095	0.04283
0.4	0.218	-0.0681	0.04964
0.442	0.2225	-0.0603	0.05002
0.4475	0.2315	-0.0568	0.05671
0.5065	0.2355	-0.0548	0.05875
0.5675	0.242	-0.04907	0.06191
0.5975	0.244	-0.04014	0.06236
0.627	0.2745	-0.03701	0.06384
0.62817	0.2775	-0.03455	0.06599
0.674	0.29325	-0.03228	0.06633
0.7125	0.29375	-0.01611	0.06925
0.7375	0.2965	-0.01217	0.06931
0.787	0.314	-0.01192	0.07306
0.808	0.3145	-0.00846	0.07453
0.8855	0.328	-0.00552	0.07806
0.8905	0.336	-0.00067	0.08124
0.977	0.34	0.00013	0.0816
	0.3445	0.00519	0.08169
	0.3635	0.01342	0.08539
	0.375	0.01353	0.08582
	0.3755	0.0144	0.08746
	0.3765	0.01602	0.08748
	0.385	0.01794	0.08879
	0.4	0.0206	0.09181
	0.401	0.02262	0.09389
	0.4025	0.02538	0.09687
	0.405	0.0286	0.0992
	0.4185	0.03322	0.09996
	0.4215	0.03512	0.10252
	0.425	0.04303	0.10535
	0.426	0.04484	0.1094
	0.4325	0.05219	0.11394
	0.4445	0.05616	0.11568
	0.4475	0.05773	0.1159
	0.449	0.06359	0.11729
	0.456	0.06514	0.11828
	0.456	0.06602	0.12402
	0.466	0.06918	0.12617
	0.471	0.06993	0.12741
	0.472	0.07073	0.12831
	0.4755	0.07198	0.14129
	0.476	0.08124	0.14492
	0.4915	0.08454	0.1465
	0.4915	0.0893	0.14761
	0.4975	0.09259	0.14785
	0.499	0.09398	0.14837
	0.507	0.09474	0.15257
	0.5085	0.0974	0.1536
	0.511	0.10214	0.15377
	0.515	0.108	0.15643
	0.5245	0.11215	0.15771
	0.529	0.11514	0.15843
	0.5505	0.11669	0.15913
	0.5545	0.12504	0.15932
	0.563	0.13074	0.16035
	0.566	0.13653	0.16185
	0.567	0.13889	0.16298
	0.5725	0.14112	0.16481
	0.5725	0.15032	0.16698
	0.5725	0.15165	0.16731
	0.573	0.16359	0.17336
	0.575	0.16361	0.178
	0.5795	0.16538	0.17807
	0.5815	0.16672	0.1813
	0.582	0.16923	0.18336
	0.5855	0.17666	0.18382
	0.614	0.17906	0.18567
	0.6295	0.19615	0.18712
	0.63	0.2086	0.19042
	0.6375	0.21194	0.1978
	0.6475	0.21513	0.19999
	0.6495	0.22842	0.20093
	0.65	0.24943	0.20113
	0.652	0.25838	0.20336
	0.6545	0.26526	0.20512
	0.657	0.26944	0.20637
	0.665	0.30007	0.20812
	0.674	0.30281	0.21001
	0.6745	0.31054	0.21398
	0.676	0.31498	0.21565
	0.679	0.32766	0.21593
	0.6875	0.36013	0.21622
	0.689	0.36015	0.2168
	0.691	0.3615	0.21714
	0.69225	0.36225	0.21738
	0.6935	0.36433	0.21884
	0.6985	0.36729	0.21909
	0.7145	0.37329	0.2198
	0.7195	0.3908	0.22002
	0.72325	0.39931	0.22237
	0.7245	0.40285	0.22414
	0.7295	0.40557	0.22622
	0.73	0.41455	0.22707
	0.736	0.42348	0.22934
	0.7475	0.4645	0.22992
	0.748	0.4796	0.23029
	0.7555	0.55575	0.2353
	0.76	0.56814	0.23552
	0.761	0.61331	0.23647
	0.7685	1.2032	0.23829
	0.7735		0.23831
	0.7755		0.23969
	0.7765		0.24472
	0.781		0.24736
	0.782		0.24737
	0.7855		0.24745
	0.7895		0.24906
	0.7905		0.24947
	0.7925		0.25001
	0.797		0.25069
	0.797		0.25177
	0.798		0.25228
	0.8005		0.2523
	0.813		0.25407
	0.81825		0.25585
	0.822		0.25707
	0.8225		0.25832
	0.848		0.25845
	0.85		0.25992
	0.864		0.26048
	0.86625		0.26479
	0.877		0.2649
	0.884		0.26671
	0.8915		0.26681
	0.8915		0.26712
	0.8985		0.26717
	0.917		0.26804
	0.9195		0.26839
	0.937		0.27165
	0.943		0.27214
	0.944		0.2728
	0.9465		0.27293
	0.954		0.27674
	0.954		0.27706
	0.9545		0.27777
	0.9565		0.27812
	0.9585		0.27853
	0.9775		0.28018
	0.978		0.28021
	0.9795		0.28089
	0.983		0.28146
	0.984		0.28333
	0.98675		0.28613
	0.9925		0.28646
	1.0025		0.288
	1.0065		0.28874
	1.0155		0.29055
	1.018		0.29115
	1.0205		0.29163
	1.027		0.29205
	1.0305		0.29451
	1.0315		0.29695
	1.042		0.2979
	1.046		0.29816
	1.0465		0.29823
	1.05		0.29987
	1.0545		0.30031
	1.057		0.30034
	1.0625		0.30311
	1.065		0.30382
	1.08475		0.30383
	1.0935		0.3044
	1.0965		0.30468
	1.0975		0.30472
	1.101		0.30668
	1.104		0.30738
	1.105		0.30768
	1.1165		0.30772
	1.121		0.30806
	1.122		0.3083
	1.1245		0.30853
	1.137		0.30873
	1.1385		0.30893
	1.14		0.30976
	1.1435		0.31026
	1.1445		0.31045
	1.148		0.31047
	1.148		0.31101
	1.149		0.31127
	1.149		0.31279
	1.1545		0.31295
	1.16		0.31433
	1.1635		0.31454
	1.1655		0.31516
	1.1665		0.31609
	1.1715		0.31669
	1.178		0.31679
	1.178		0.31697
	1.1805		0.31911
	1.192		0.31934
	1.1985		0.32117
	1.2		0.32415
	1.2025		0.32442
	1.204		0.32445
	1.2065		0.32579
	1.2095		0.32743
	1.2095		0.32902
	1.22		0.3311
	1.2265		0.33149
	1.227		0.33201
	1.235		0.33234
	1.2415		0.33414
	1.244		0.33715
	1.2445		0.33786
	1.2465		0.33881
	1.247		0.33939
	1.252		0.33954
	1.2565		0.34214
	1.25775		0.34216
	1.2595		0.34224
	1.2615		0.3428
	1.2695		0.34304
	1.2855		0.34365
	1.2985		0.34404
	1.301		0.3447
	1.305		0.34494
	1.315		0.34526
	1.3195		0.34527
	1.326		0.3454
	1.3325		0.34544
	1.334		0.34585
	1.335		0.34829
	1.3385		0.35044
	1.344		0.35119
	1.3545		0.35307
	1.363		0.35332
	1.3635		0.35396
	1.367		0.35432
	1.3725		0.35455
	1.377		0.35487
	1.3775		0.35683
	1.38		0.35791
	1.3825		0.35827
	1.3965		0.36021
	1.39675		0.36211
	1.4005		0.36349
	1.4035		0.36383
	1.406		0.36396
	1.4095		0.36531
	1.41		0.36536
	1.4145		0.36544
	1.422		0.36658
	1.424		0.36661
	1.4245		0.36762
	1.435		0.37062
	1.436		0.37143
	1.445		0.37456
	1.4455		0.37533
	1.4455		0.37596
	1.4495		0.37612
	1.4615		0.37639
	1.466		0.37654
	1.47		0.37808
	1.4745		0.37885
	1.4755		0.37919
	1.52		0.38021
	1.5215		0.38037
	1.5225		0.38085
	1.524		0.38118
	1.5385		0.38383
	1.5485		0.38457
	1.563		0.3858
	1.5665		0.38637
	1.56825		0.38648
	1.5695		0.38684
	1.57		0.38692
	1.5705		0.38809
	1.571		0.38861
	1.5725		0.38862
	1.5915		0.38913
	1.5945		0.38927
	1.6015		0.38999
	1.6035		0.3902
	1.6255		0.39036
	1.628		0.39085
	1.63225		0.39308
	1.6565		0.39493
	1.6595		0.39545
	1.687		0.39596
	1.689		0.39627
	1.693		0.39759
	1.699		0.39804
	1.7045		0.39836
	1.716		0.39847
	1.7225		0.39859
	1.7325		0.40057
	1.7375		0.40103
	1.7395		0.40117
	1.746		0.40279
	1.7505		0.40426
	1.75625		0.40526
	1.758		0.40538
	1.779		0.40662
	1.78		0.40799
	1.7985		0.40808
	1.8025		0.40851
	1.807		0.40868
	1.8075		0.40885
	1.8185		0.40951
	1.8265		0.40996
	1.845		0.41066
	1.85		0.4122
	1.875		0.41431
	1.8765		0.4146
	1.8985		0.41472
	1.8995		0.41521
	1.9095		0.41581
	1.9115		0.4168
	1.913		0.41713
	1.915		0.41736
	1.933		0.41774
	1.9385		0.41788
	1.948		0.41892
	1.9645		0.42015
	1.978		0.42017
	1.99325		0.42142
	2.0055		0.42212
	2.0425		0.4227
	2.0635		0.42496
	2.071		0.42532
	2.0895		0.42588
	2.118		0.42647
	2.155		0.4314
	2.16		0.43165
	2.162		0.43175
	2.166		0.43226
	2.1705		0.43251
	2.17575		0.43634
	2.1765		0.43712
	2.24575		0.43717
	2.288		0.43745
	2.3085		0.43748
	2.3685		0.43933
	2.377		0.43935
	2.3975		0.44143
	2.521		0.44145
	2.5585		0.44163
	2.59		0.44183
	2.606		0.44189
	2.6185		0.44264
	2.6855		0.44378
	2.708		0.44478
	2.787		0.44492
	2.994		0.44558
	4.003		0.44588
			0.44646
			0.44961
			0.4497
			0.45103
			0.45165
			0.4539
			0.454
			0.45444
			0.45494
			0.45581
			0.45633
			0.45862
			0.45892
			0.45993
			0.4611
			0.4612
			0.46162
			0.46362
			0.46366
			0.46523
			0.46566
			0.46597
			0.46605
			0.46647
			0.46658
			0.46688
			0.46924
			0.47043
			0.47124
			0.47206
			0.47284
			0.47308
			0.47317
			0.47369
			0.47376
			0.47416
			0.47446
			0.47477
			0.47635
			0.47648
			0.47859
			0.47875
			0.47916
			0.47933
			0.47946
			0.47966
			0.48011
			0.48012
			0.48046
			0.48091
			0.4827
			0.48291
			0.48315
			0.48334
			0.48402
			0.48447
			0.48464
			0.4857
			0.48608
			0.48609
			0.4864
			0.48742
			0.48866
			0.49216
			0.49255
			0.49355
			0.49407
			0.49428
			0.49437
			0.4955
			0.49665
			0.49667
			0.49681
			0.49853
			0.49882
			0.49895
			0.50054
			0.50269
			0.50311
			0.50331
			0.50457
			0.50552
			0.5059
			0.50672
			0.50755
			0.5076
			0.509
			0.50958
			0.50997
			0.51004
			0.51097
			0.51223
			0.51331
			0.51355
			0.51429
			0.51639
			0.51641
			0.51711
			0.51756
			0.51851
			0.51881
			0.52011
			0.52044
			0.52055
			0.52059
			0.52097
			0.5224
			0.52302
			0.52381
			0.52408
			0.5246
			0.52502
			0.52574
			0.52667
			0.52678
			0.52701
			0.52766
			0.52865
			0.52896
			0.52912
			0.52919
			0.52987
			0.53138
			0.53303
			0.53387
			0.53437
			0.53459
			0.53467
			0.5348
			0.53514
			0.53524
			0.53586
			0.53652
			0.53683
			0.53684
			0.53701
			0.53746
			0.53747
			0.53752
			0.53765
			0.53818
			0.53862
			0.53913
			0.53914
			0.53947
			0.5395
			0.53953
			0.54077
			0.54117
			0.54244
			0.54245
			0.54355
			0.54361
			0.54395
			0.544
			0.54498
			0.54513
			0.54564
			0.54641
			0.54684
			0.54725
			0.54784
			0.54798
			0.54815
			0.54836
			0.54842
			0.54935
			0.54963
			0.55007
			0.55061
			0.55081
			0.55191
			0.55219
			0.55232
			0.55304
			0.55358
			0.55388
			0.55553
			0.55555
			0.55696
			0.55828
			0.55835
			0.55955
			0.56083
			0.56199
			0.56225
			0.56303
			0.56326
			0.56333
			0.56362
			0.56455
			0.56479
			0.56492
			0.56532
			0.56575
			0.56598
			0.56723
			0.56792
			0.56879
			0.56911
			0.57072
			0.57246
			0.57281
			0.57313
			0.57414
			0.57483
			0.57504
			0.57513
			0.57513
			0.57544
			0.57546
			0.57601
			0.57623
			0.57685
			0.57714
			0.57849
			0.57849
			0.57898
			0.57945
			0.58055
			0.58096
			0.58118
			0.58179
			0.5821
			0.58216
			0.58245
			0.58318
			0.58322
			0.58347
			0.58372
			0.58417
			0.58446
			0.58483
			0.58487
			0.58494
			0.58519
			0.58554
			0.58596
			0.5864
			0.58691
			0.58751
			0.58882
			0.58953
			0.58954
			0.59017
			0.59039
			0.59069
			0.59162
			0.59201
			0.59318
			0.59327
			0.59327
			0.59449
			0.59516
			0.59556
			0.59571
			0.59586
			0.59607
			0.59669
			0.59677
			0.59752
			0.59847
			0.59932
			0.59952
			0.6009
			0.60182
			0.60271
			0.603
			0.6035
			0.60377
			0.60443
			0.60636
			0.6071
			0.60814
			0.60843
			0.60881
			0.60961
			0.61019
			0.61144
			0.61358
			0.61358
			0.61393
			0.61423
			0.61532
			0.61582
			0.6173
			0.6196
			0.61964
			0.62044
			0.62111
			0.62233
			0.62289
			0.62337
			0.62383
			0.62415
			0.6243
			0.62533
			0.62581
			0.62654
			0.62697
			0.62739
			0.62826
			0.62837
			0.62977
			0.62993
			0.63025
			0.63034
			0.63041
			0.63073
			0.63096
			0.63207
			0.63214
			0.63297
			0.6353
			0.63627
			0.63722
			0.63819
			0.63852
			0.63896
			0.64012
			0.64115
			0.64133
			0.64144
			0.64145
			0.64164
			0.64171
			0.64236
			0.64245
			0.64349
			0.64483
			0.64537
			0.64618
			0.64712
			0.64861
			0.64883
			0.64974
			0.65011
			0.65131
			0.65304
			0.6532
			0.65331
			0.65351
			0.65516
			0.65539
			0.65543
			0.6557
			0.65754
			0.65786
			0.65868
			0.65891
			0.66087
			0.66087
			0.66124
			0.66165
			0.66231
			0.66299
			0.66331
			0.66427
			0.66441
			0.66442
			0.66476
			0.66546
			0.66555
			0.66597
			0.66614
			0.66941
			0.6695
			0.66964
			0.66978
			0.67216
			0.67297
			0.67323
			0.67387
			0.67461
			0.67509
			0.67565
			0.67673
			0.67678
			0.6779
			0.67862
			0.67867
			0.68086
			0.681
			0.68106
			0.68129
			0.68153
			0.68168
			0.68256
			0.68294
			0.68435
			0.6847
			0.68477
			0.68506
			0.68528
			0.68562
			0.68581
			0.68588
			0.68667
			0.68674
			0.68727
			0.68799
			0.68837
			0.68883
			0.68927
			0.68937
			0.69017
			0.69033
			0.69039
			0.69136
			0.69197
			0.69212
			0.69235
			0.69254
			0.69277
			0.69282
			0.69307
			0.69378
			0.69519
			0.69782
			0.69821
			0.69825
			0.6986
			0.69868
			0.69875
			0.69915
			0.69927
			0.69931
			0.69955
			0.70035
			0.70161
			0.70178
			0.7018
			0.70225
			0.70283
			0.70337
			0.70374
			0.70384
			0.70392
			0.70428
			0.70483
			0.70515
			0.70616
			0.70621
			0.70644
			0.70702
			0.70951
			0.70981
			0.71172
			0.7123
			0.71243
			0.71292
			0.71568
			0.7159
			0.71597
			0.71705
			0.71911
			0.71972
			0.72068
			0.72124
			0.72143
			0.72158
			0.72181
			0.72248
			0.72324
			0.7236
			0.72537
			0.72569
			0.7266
			0.72664
			0.728
			0.72873
			0.72914
			0.72967
			0.73062
			0.73115
			0.73159
			0.73206
			0.73249
			0.73264
			0.73273
			0.73324
			0.73369
			0.73381
			0.73458
			0.73693
			0.73693
			0.73698
			0.73785
			0.73826
			0.73888
			0.73916
			0.73994
			0.74076
			0.74125
			0.74186
			0.74199
			0.74257
			0.74432
			0.74454
			0.74589
			0.74699
			0.74744
			0.7481
			0.74921
			0.74969
			0.74994
			0.75148
			0.75209
			0.75269
			0.75271
			0.753
			0.754
			0.75405
			0.75405
			0.75429
			0.75477
			0.75539
			0.75585
			0.75591
			0.75598
			0.75644
			0.75711
			0.75797
			0.75817
			0.75822
			0.75863
			0.75877
			0.75968
			0.76009
			0.76019
			0.76033
			0.76122
			0.76169
			0.76183
			0.76489
			0.76614
			0.76623
			0.76799
			0.76862
			0.76877
			0.76882
			0.77035
			0.77088
			0.77193
			0.77205
			0.77237
			0.77255
			0.77476
			0.77556
			0.77575
			0.77608
			0.77639
			0.77884
			0.77959
			0.78126
			0.78198
			0.78231
			0.78279
			0.78303
			0.78304
			0.78358
			0.78359
			0.78397
			0.78462
			0.78513
			0.78539
			0.78697
			0.78791
			0.78817
			0.78933
			0.79038
			0.791
			0.79151
			0.79483
			0.79759
			0.79862
			0.79967
			0.80001
			0.80017
			0.80141
			0.80291
			0.80299
			0.8032
			0.80494
			0.80517
			0.80576
			0.80604
			0.80616
			0.80711
			0.80716
			0.80784
			0.80801
			0.80818
			0.80853
			0.80894
			0.80919
			0.81009
			0.8103
			0.81059
			0.81168
			0.81221
			0.81275
			0.81278
			0.8131
			0.81327
			0.81363
			0.81481
			0.81496
			0.81511
			0.81672
			0.81737
			0.81746
			0.81784
			0.81791
			0.81816
			0.81829
			0.81834
			0.81852
			0.81863
			0.81882
			0.81934
			0.81982
			0.82151
			0.82184
			0.82344
			0.82345
			0.82508
			0.82575
			0.82591
			0.82687
			0.82709
			0.82714
			0.82749
			0.82769
			0.82908
			0.82913
			0.82935
			0.82981
			0.82983
			0.83008
			0.83067
			0.83117
			0.83447
			0.83472
			0.83548
			0.83699
			0.83836
			0.83859
			0.83873
			0.83884
			0.83929
			0.8399
			0.84038
			0.84087
			0.84167
			0.84344
			0.844
			0.84403
			0.84426
			0.84462
			0.84547
			0.84653
			0.84684
			0.84697
			0.84729
			0.84754
			0.84796
			0.8482
			0.84914
			0.84956
			0.84974
			0.85024
			0.8504
			0.85422
			0.85427
			0.85619
			0.85642
			0.85663
			0.85706
			0.85771
			0.85801
			0.86226
			0.86238
			0.86595
			0.8661
			0.86814
			0.86816
			0.86938
			0.86968
			0.86989
			0.87073
			0.87232
			0.87283
			0.87324
			0.87398
			0.87448
			0.87486
			0.87504
			0.87653
			0.87743
			0.87747
			0.87887
			0.8794
			0.88084
			0.88222
			0.88316
			0.88404
			0.88557
			0.88675
			0.88676
			0.8888
			0.89078
			0.8916
			0.89259
			0.89335
			0.89363
			0.89426
			0.89466
			0.89571
			0.89576
			0.89624
			0.8966
			0.89957
			0.90159
			0.90319
			0.9041
			0.90411
			0.90482
			0.90558
			0.9056
			0.90659
			0.90858
			0.90938
			0.91122
			0.91127
			0.91218
			0.91323
			0.91443
			0.91569
			0.91683
			0.91951
			0.92017
			0.92095
			0.9212
			0.92167
			0.92341
			0.92374
			0.92589
			0.92674
			0.92769
			0.92805
			0.92906
			0.92941
			0.9319
			0.93212
			0.93233
			0.93238
			0.93328
			0.93485
			0.93486
			0.93486
			0.93636
			0.93886
			0.93926
			0.93991
			0.94049
			0.94453
			0.94481
			0.94568
			0.94578
			0.94687
			0.94741
			0.94823
			0.94906
			0.94951
			0.94984
			0.95139
			0.95155
			0.95305
			0.95343
			0.95352
			0.95417
			0.95515
			0.95662
			0.95745
			0.96005
			0.96095
			0.96161
			0.96311
			0.96316
			0.96343
			0.96356
			0.964
			0.96558
			0.9663
			0.96694
			0.96698
			0.96937
			0.97213
			0.97366
			0.97438
			0.97556
			0.97591
			0.97661
			0.97709
			0.97841
			0.97975
			0.97977
			0.98048
			0.98287
			0.98296
			0.98499
			0.98602
			0.98712
			0.98862
			0.98869
			0.98998
			0.99029
			0.99342
			0.99381
			0.99653
			0.99715
			0.99926
			0.9994
			1.00191
			1.00262
			1.0027
			1.00304
			1.00323
			1.0037
			1.00385
			1.00562
			1.00677
			1.00697
			1.00732
			1.00742
			1.00768
			1.00876
			1.01008
			1.01253
			1.01291
			1.01597
			1.0179
			1.01864
			1.01913
			1.01983
			1.01983
			1.02081
			1.02307
			1.02392
			1.02437
			1.02506
			1.02635
			1.02651
			1.02703
			1.02727
			1.02732
			1.0291
			1.03316
			1.03329
			1.03335
			1.03394
			1.03678
			1.0372
			1.04091
			1.04121
			1.04208
			1.04269
			1.04489
			1.04507
			1.04565
			1.0458
			1.04603
			1.04649
			1.0484
			1.04859
			1.04874
			1.04954
			1.05072
			1.05141
			1.05184
			1.05238
			1.05324
			1.05379
			1.0551
			1.05554
			1.05664
			1.0568
			1.05863
			1.05959
			1.05996
			1.06157
			1.06177
			1.06234
			1.06317
			1.06422
			1.06966
			1.07126
			1.07233
			1.07329
			1.07351
			1.07416
			1.07545
			1.07616
			1.07651
			1.07867
			1.07925
			1.08063
			1.08104
			1.08219
			1.08267
			1.08329
			1.08492
			1.08556
			1.08636
			1.08793
			1.08865
			1.08884
			1.08961
			1.0909
			1.09144
			1.09178
			1.09281
			1.09576
			1.09853
			1.1034
			1.10736
			1.10814
			1.10841
			1.11027
			1.11242
			1.11404
			1.11476
			1.11508
			1.11572
			1.11648
			1.11749
			1.11813
			1.11898
			1.1197
			1.12429
			1.1251
			1.12516
			1.12519
			1.12557
			1.1303
			1.13128
			1.13256
			1.13432
			1.13636
			1.13726
			1.13751
			1.13844
			1.13889
			1.14027
			1.14046
			1.14059
			1.14165
			1.14453
			1.14539
			1.14829
			1.15078
			1.15313
			1.15577
			1.15657
			1.15657
			1.15789
			1.15926
			1.16094
			1.16181
			1.1625
			1.16282
			1.16304
			1.16449
			1.1645
			1.16625
			1.16729
			1.16775
			1.16943
			1.16976
			1.17258
			1.17592
			1.17607
			1.17845
			1.17993
			1.18202
			1.18254
			1.18711
			1.18751
			1.18925
			1.18966
			1.18996
			1.19031
			1.19174
			1.19393
			1.19468
			1.19468
			1.19482
			1.19519
			1.19811
			1.19912
			1.19954
			1.20066
			1.20081
			1.2034
			1.20386
			1.20522
			1.20529
			1.20686
			1.20814
			1.20863
			1.21187
			1.2129
			1.21476
			1.21491
			1.216
			1.21618
			1.21637
			1.21763
			1.22307
			1.22566
			1.22697
			1.23488
			1.23568
			1.23651
			1.23781
			1.2456
			1.24809
			1.24842
			1.24948
			1.25316
			1.25325
			1.25628
			1.25854
			1.26357
			1.26522
			1.26614
			1.26818
			1.27006
			1.27009
			1.27019
			1.27045
			1.27186
			1.27281
			1.27411
			1.27538
			1.27739
			1.2781
			1.27903
			1.28057
			1.28109
			1.28118
			1.28156
			1.28425
			1.28485
			1.28803
			1.28878
			1.28991
			1.28992
			1.29254
			1.29385
			1.29532
			1.29969
			1.30249
			1.30603
			1.30774
			1.30803
			1.3144
			1.31502
			1.31595
			1.3162
			1.31901
			1.32002
			1.32125
			1.32181
			1.32521
			1.32857
			1.33558
			1.33633
			1.3391
			1.34093
			1.34279
			1.34493
			1.34877
			1.35379
			1.35839
			1.35931
			1.35936
			1.36293
			1.36622
			1.37159
			1.37193
			1.37684
			1.38699
			1.38982
			1.39526
			1.40019
			1.40051
			1.40714
			1.4073
			1.40802
			1.41009
			1.41365
			1.41851
			1.41909
			1.42917
			1.4353
			1.43735
			1.44809
			1.4485
			1.45018
			1.45035
			1.45153
			1.45349
			1.45612
			1.45635
			1.46633
			1.46666
			1.47005
			1.48023
			1.48804
			1.48816
			1.48914
			1.49105
			1.49187
			1.51094
			1.51418
			1.52918
			1.53201
			1.53612
			1.54074
			1.54366
			1.54713
			1.54901
			1.55355
			1.56349
			1.58571
			1.58691
			1.60957
			1.62757
			1.63782
			1.66525
			1.6737
			1.6804
			1.68993
			1.69879
			1.71279
			1.74529
			1.76222
			1.77939
			1.79237
			1.79496
			1.80123
			1.80136
			1.80141
			1.84709
			1.84766
			1.8499
			1.884
			1.90671
			1.91466
			1.93745
			1.94674
			1.96574
			1.97357
			2.10901
			2.69725
