# Supplementary material for: LIPG signaling promotes tumor initiation and metastasis of human basal-like triple-negative breast cancer
Source: eLife. 2018 Jan 19;7:e31334. doi: 10.7554/eLife.31334 (PMC5809145; doi:10.7554/eLife.31334)
Supplement: Figure 7—source data 3. — The source data file contains numerical data that were used to generate data graphs presented in sub-figures (7G, H) of Figure 7. [file elife-31334-fig7-data3.xlsx]

## Sheet: Sheet1
The source data for Figure 7G: DTX3L protein expression positively correlates with LIPG expression in TNBC
LIPG	DTX3L
275	270
220	160
255	265
80	125
240	210
110	160
160	205
180	225
50	75
The source data for Figure 7H: DTX3L mRNA expression is positively associated with ISG15 expression in human basal-like breast cancers
	DTX3L	ISG15
H021108	0.584	1.95
H516397	1.433	1.895
H629717	1.21	1.091
H629719	0.524	2.105
H957385	0.464	0.176
H957549	0.705	0.351
I130598	0.846	0.59
I258318	1.916	1.635
I258325	1.668	1.16
I383208	0.414	2.551
I612036	1.409	0.903
I633488	0.103	0.914
J018787	1.192	1.289
J168308	1.094	1.231
J168936	1.505	1.332
J168937	-0.203	-0.098
J460617	0.562	0.892
J470138	1.172	0.527
J472757	1.45	1.632
J472758	0.664	0.278
J762326	1.236	1.513
K121818	0.269	0.879
K205585	1.239	1.321
K282376	1.024	0.495
K282378	0.369	0.418
K320417	0.719	1.703
K826609	1.372	0.78
K826616	0.784	1.117
L432758	0.946	1.49
L444939	0.266	1.308
L768268	1.957	3.123
L775237	1.388	2.944
M200498	0.708	0.887
M228987	0.641	2.485
M256097	1.533	1.852
M256098	0.656	0.128
M308596	1.713	5.184
N123517	0.666	1.934
N820416	1.593	2.766
N820418	0.952	0.699
N843157	0.948	0.125
N852648	2.006	2.014
O219015	0.164	0.065
O219016	0.188	0.429
P553317	0.15	0.791
