# Supplementary material for: LIPG signaling promotes tumor initiation and metastasis of human basal-like triple-negative breast cancer
Source: eLife. 2018 Jan 19;7:e31334. doi: 10.7554/eLife.31334 (PMC5809145; doi:10.7554/eLife.31334)
Supplement: Figure 7—source data 4. — The source data file contains numerical data that were used to generate the data graph presented in Figure 7—figure supplement 2. [file elife-31334-fig7-data4.xlsx]

## Sheet: Sheet1
The source data for Figure 7-figure supplement 2
Basal-like	Her2-positive	Luminal A	Luminal B
-0.203	0.216	-0.982	-0.629
0.103	0.428	-0.926	-0.404
0.15	0.506	-0.473	-0.313
0.164	0.519	-0.453	-0.0365
0.188	0.576	-0.119	0.12
0.266	0.581	-0.044	0.316
0.269	0.581	-0.037	0.33
0.369	0.589	-0.02	0.3975
0.414	0.608	-0.0115	0.596
0.464	0.673	0.023	0.605
0.524	0.87	0.063	0.683
0.562	0.948	0.089	0.683
0.584	0.968	0.128	0.686
0.641	1.0525	0.144	0.74
0.656	1.117	0.144	0.918
0.664	1.233	0.195	0.983
0.666	1.2835	0.208	1.01
0.705	1.288	0.365	1.08
0.708	1.51	0.377	1.146
0.719	1.704	0.398	1.184
0.784	1.73	0.41	1.289
0.846		0.418	1.31
0.946		0.422	1.403
0.948		0.4655	1.595
0.952		0.469	1.6
1.024		0.51
1.094		0.513
1.172		0.547
1.192		0.565
1.21		0.575
1.236		0.612
1.239		0.616
1.372		0.678
1.388		0.6895
1.409		0.714
1.433		0.75
1.45		0.771
1.505		0.791
1.533		0.807
1.593		0.812
1.668		0.852
1.713		0.867
1.916		0.871
1.957		1.034
2.006		1.39
		1.686
