# Supplementary material for: LIPG signaling promotes tumor initiation and metastasis of human basal-like triple-negative breast cancer
Source: eLife. 2018 Jan 19;7:e31334. doi: 10.7554/eLife.31334 (PMC5809145; doi:10.7554/eLife.31334)
Supplement: Figure 8—source data 1. — The source data file contains numerical data that were used to generate data graphs presented in sub-figures (8B, C, D, G, H, I, J) of Figure 8. [file elife-31334-fig8-data1.xlsx]

## Sheet: Sheet1
The source data for Figure 8B: DTX3L knockdown increases EpCAM+ cells in MCF10DCIS
% of EpCAM+ cells
	siControl	siDTX3L-1	siDTX3L-2
N1	25.13	59.84	61.62
N2	22.52	48.76	42.64
N3	31.14	53.37	51.47
The source data for Figure 8C: DTX3L inactivation downregulates the expression of multiple stem cell genes in MCF10DCIS cells
	siControl			siDTX3L-1			siDTX3L-2
fold	Mean	SD	n	Mean	SD	n	Mean	SD	n
IL6	0.97	0.043	3	0.312	0.069	3	0.372	0.045	3
SOX2	1.12	0.075	3	0.649	0.087	3	0.699	0.074	3
OCT4	1.03	0.102	3	0.381	0.074	3	0.436	0.093	3
ABCG2	0.98	0.129	3	0.454	0.056	3	0.424	0.087	3
PROCR	0.96	0.117	3	0.345	0.036	3	0.455	0.086	3
SOX9	1.07	0.068	3	0.704	0.042	3	0.754	0.065	3
The source data for Figure 8D: DTX3L depletion induces the decreased expression of multiple basal/EMT genes in MCF10DCIS cells
	siControl			siDTX3L-1			siDTX3L-2
fold	Mean	SD	n	Mean	SD	n	Mean	SD	n
KRT14	1.04	0.153	3	0.148	0.017	3	0.215	0.022	3
Vimentin	1.06	0.056	3	0.437	0.063	3	0.476	0.052	3
FOXC2	0.96	0.132	3	0.176	0.025	3	0.192	0.033	3
TWIST	1.05	0.049	3	0.483	0.042	3	0.497	0.057	3
ZEB1	1.03	0.038	3	0.676	0.086	3	0.733	0.074	3
SLUG	0.98	0.083	3	0.526	0.074	3	0.456	0.039	3
N-cadherin	0.97	0.148	3	0.272	0.036	3	0.412	0.064	3
Fibronectin	1.02	0.074	3	0.473	0.114	3	0.533	0.081	3
The souce data for Figure 8G: The LIPG-ISG15 axis mediates DTX3L overexpression-enhanced invasion of MDA-MB-468 cells
	Vector+siCTRL	DTX3L OE+siCTRL	DTX3L OE+siDTX3L	DTX3L OE+siLIPG	DTX3L OE+si-ISG15
N1	416	813	12	113	64
N2	358	668	17	147	87
N3	314	735	22	183	135
The souce data for Figure 8H: The LIPG-ISG15 axis mediates DTX3L overexpression-promoted secondary CSC sphere formation of MDA-MB-468 cells
	Vector+siCTRL	DTX3L OE+siCTRL	DTX3L OE+siDTX3L	DTX3L OE+siLIPG	DTX3L OE+si-ISG15
N1	117	195	6	44	133
N2	125	247	17	59	148
N3	148	284	13	73	173
The source data for Figure 8I: The LIPG-ISG15 axis mediates DTX3L overexpression-induced increases in expression of stem cell and EMT genes in MDA-MB-468 cells
	Vector+siControl			DTX3L OE+siControl			DTX3L OE+siDTX3L			DTX3L OE+siLIPG			DTX3L OE+si-ISG15
fold	Mean	SD	n	Mean	SD	n	Mean	SD	n	Mean	SD	n	Mean	SD	n
SOX1	0.992	0.065	3	8.246	1.357	3	0.413	0.044	3	0.573	0.084	3	8.473	1.044	3
ABCG2	1.013	0.113	3	4.626	0.334	3	0.296	0.056	3	0.506	0.096	3	1.536	0.396	3
ALDH1	0.977	0.084	3	3.873	0.474	3	0.523	0.031	3	0.693	0.106	3	2.693	0.276	3
ZEB2	0.963	0.048	3	4.271	0.237	3	0.353	0.056	3	0.487	0.107	3	0.274	0.035	3
SLUG	1.038	0.123	3	7.643	1.126	3	0.473	0.075	3	0.674	0.126	3	0.373	0.078	3
Fibronectin	1.027	0.097	3	2.878	0.523	3	0.436	0.069	3	0.587	0.062	3	0.128	0.015	3
The source data for Figure 8J: The DTX3L-LIPG-ISG15 axis is required for in vivo tumor formation of MDA-MB-468 cells in nude mice
Tumor volume	(mm3)
	Vector Control			DTX3L OE			DTX3L OE+DTX3L KD			DTX3L OE+LIPG KD			DTX3L OE+ISG15 KD
Day	Mean	SD	n	Mean	SD	n	Mean	SD	n	Mean	SD	n	Mean	SD	n
4	44.3854	12.6961	6	33.9896	18.732	6	34.1354	5.29363	6	23.8542	13.1092	6	25.0312	10.9524	6
8	91.7648	37.807	6	95.8494	45.1729	6	34.1354	5.29363	6	32.547	17.8805	6	40.3906	14.4192	6
12	171.72	62.5022	6	251.748	93.4929	6	28.0903	6.63842	6	40.5872	21.1429	6	64.8364	19.6534	6
16	282.069	107.588	6	519.738	183.344	6	26.5527	6.19927	6	52.0967	26.9106	6	94.9226	25.581	6
20	434.551	163.09	6	945.413	285.526	6	22.2939	6.81325	6	64.248	30.8288	6	136.721	32.8735	6
24	670.801	245.158	6	1592.51	410.541	6	20.8958	7.65472	6	81.1771	37.3858	6	213.752	52.7546	6
